# Supplementary material for: Thiophene-phenylquinazoline probe for selective ratiometric fluorescence and visual detection of Fe(iii) and turn-off fluorescence for I− and its applications
Source: Royal Society of Chemistry journal article supplement (doi:10.1039/d0pp00193g), 2020-10-27
Supplement: d0pp00193g1.pdf [file d0pp00193g1.pdf]

## Thiophene-phenylquinazoline Probe for Selective Ratiometric Fluorescence and Visual Detection of Fe (III) and Turn-Off Fluorescence for I<sup>-</sup> and its Applications

Kannikanti Gavash Harsha <sup>a,b</sup>, Boddu.Ananda Rao <sup>\*c</sup>, Tulsidas.R.Baggi<sup>\*d</sup>, S.Prabhakar<sup>\* a,b</sup> and V. Jayathirtha Rao<sup>\*e,b</sup>

<sup>a</sup>. Dept. Of Analytical and Structural Chemistry, CSIR-Indian Institute of Chemical Technology, Tarnaka, Hyderabad, 500 007, India.

<sup>b</sup>.AcSIR, (CSIR-HRDC) Campus Postal Staff College Area, Sector 19, Kamla Nehru Nagar, Ghaziabad, Uttar Pradesh- 201002, India.

<sup>c</sup>.Department of Chemistry Osmania University, Hyderabad-500007, India.

<sup>d</sup>.Formerly of Central Forensic Science Laboratory, Ramanthapur, Hyderabad 500013, India. & Chemistry Dept., University college of Science, Osmania University, Hyderabad 500007, India.

<sup>e</sup>.Fluoro Agro Chemicals Division, CSIR-Indian Institute of Chemical Technology, Uppal Road Tanaka, Hyderabad 500007, India.

### Figure captions and figure numbers

### Page

|                                                                                                                                                                                                                                                                                                                                      |        |
|--------------------------------------------------------------------------------------------------------------------------------------------------------------------------------------------------------------------------------------------------------------------------------------------------------------------------------------|--------|
| NMR and Mass spectra of BQT (Figs. S1-S4)                                                                                                                                                                                                                                                                                            | S2, S3 |
| Benesi–Hildebrand plots to determine binding constants for BQT-Fe <sup>3+</sup> (Fig.S5)                                                                                                                                                                                                                                             | S4     |
| Linearity curve from fluorescence titration for BQT-Fe <sup>3+</sup> complex (Fig.S6)                                                                                                                                                                                                                                                | S4     |
| Linearity curve from UV-Vis titration for BQT-Fe <sup>3+</sup> complex (Fig. S7)                                                                                                                                                                                                                                                     | S5     |
| Job's plot of BQT-Fe <sup>3+</sup> complex (Fig. S8)                                                                                                                                                                                                                                                                                 | S6     |
| Reversible cycles of absorption at 420 nm upon addition of Fe <sup>3+</sup> and EDTA alternatively in CH <sub>3</sub> CN solution of BQT.( Fig. S9)                                                                                                                                                                                  | S6     |
| The absorbance (a) spectra of I <sup>-</sup> titration (0-1100μM) Insets: absorbance at 362 nm Vs concentration of I <sup>-</sup> and fluorescence (b) spectra of I <sup>-</sup> titration (0-900μM) Insets: intensity at 426 nm Vs concentration of I <sup>-</sup> with the BQT (10 μM). Excitation wavelength is 362nm.( Fig. S10) | S7     |
| Stern-Volmer plot for BQT quenching upon addition of iodide ion, here I <sub>0</sub> = BQT intensity without I <sup>-</sup> ion and I = intensity with I <sup>-</sup> ion. (Fig. S11)                                                                                                                                                | S7     |
| Job's plot of BQT-I <sup>-</sup> complex. (Fig. S12)                                                                                                                                                                                                                                                                                 | S8     |
| Linearity curve from fluorescence titration for BQT- I <sup>-</sup> complex (Fig. S13)                                                                                                                                                                                                                                               | S8     |

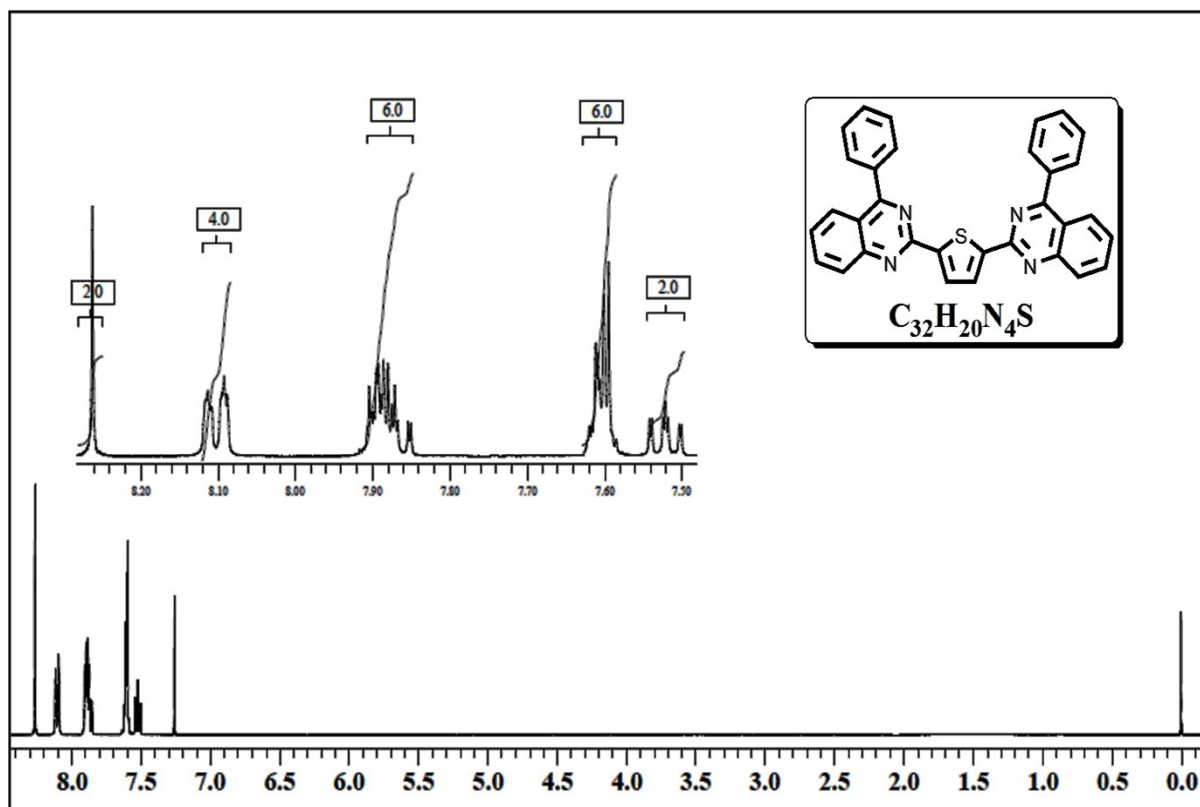

Fig. S1:  $^1\text{H}$  NMR spectrum of BQT

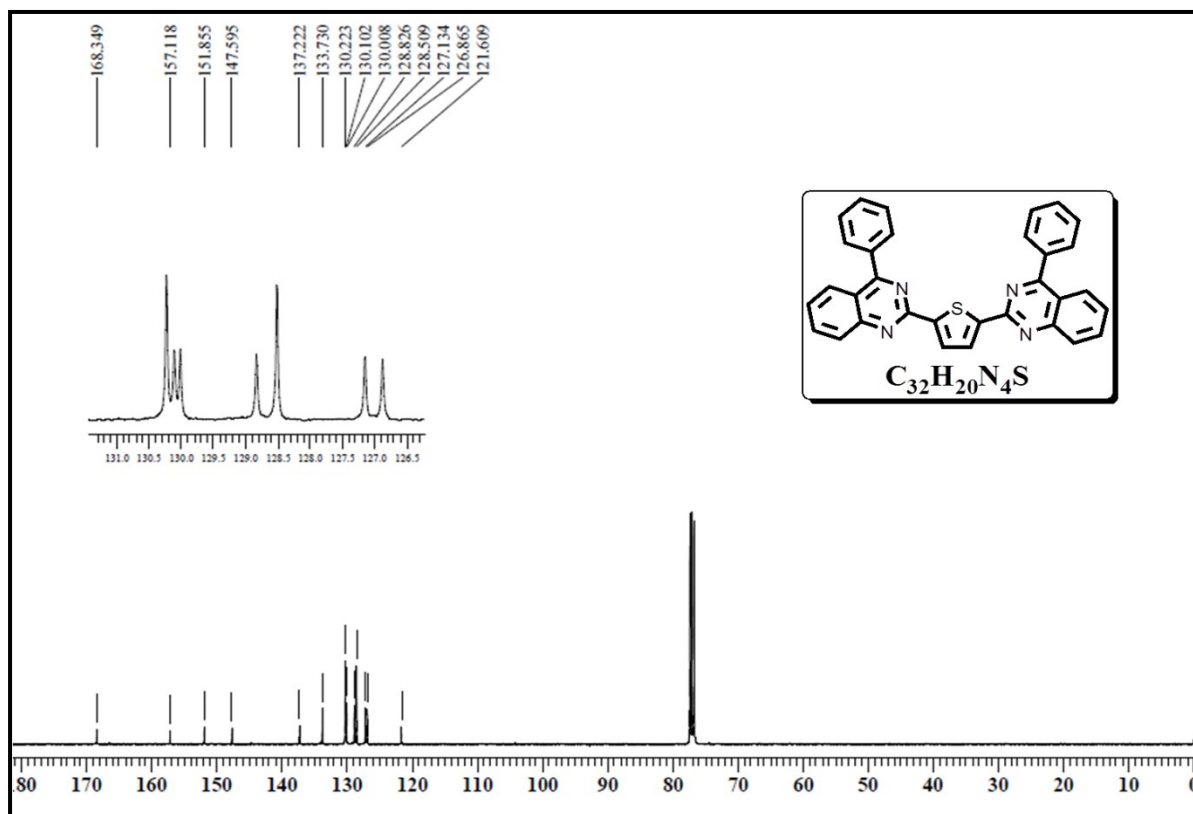

Fig. S2:  $^{13}\text{C}$  NMR spectrum of BQT

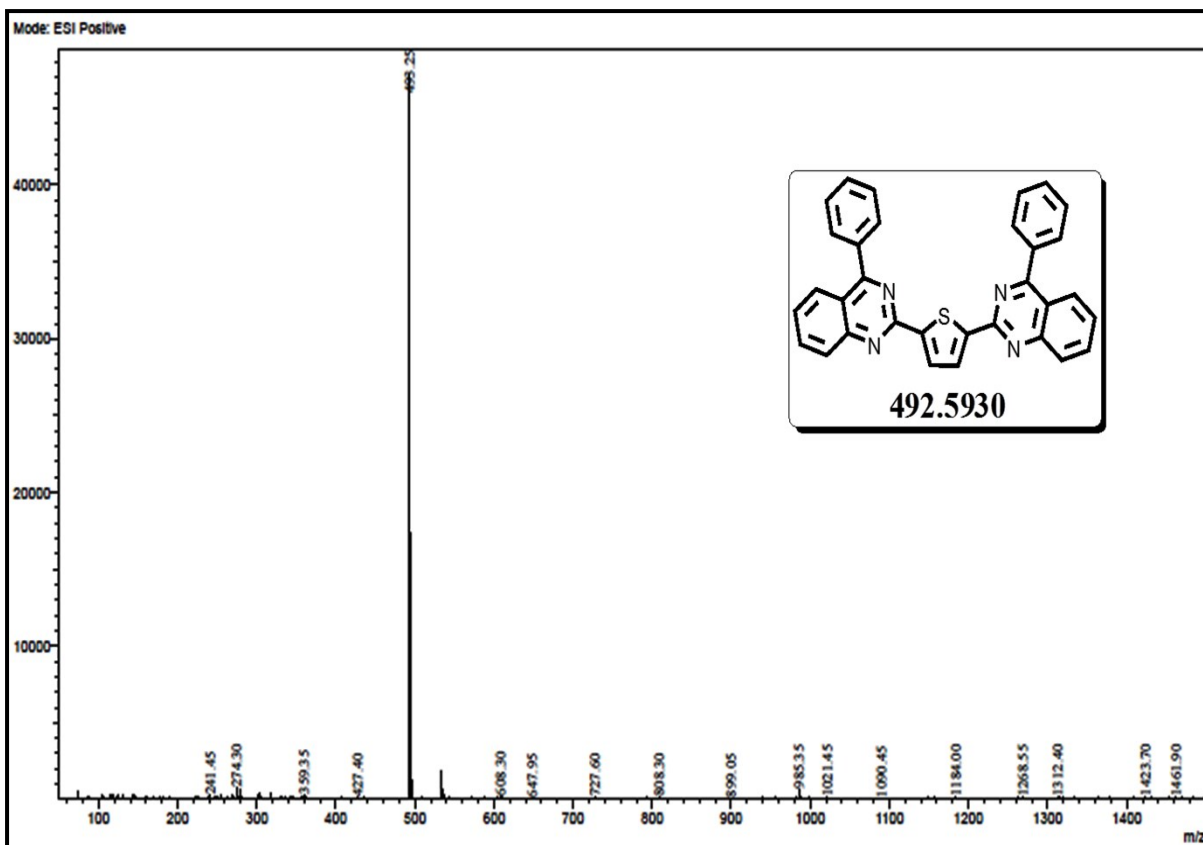

Fig. S3: ESI-Mass spectrum of BQT

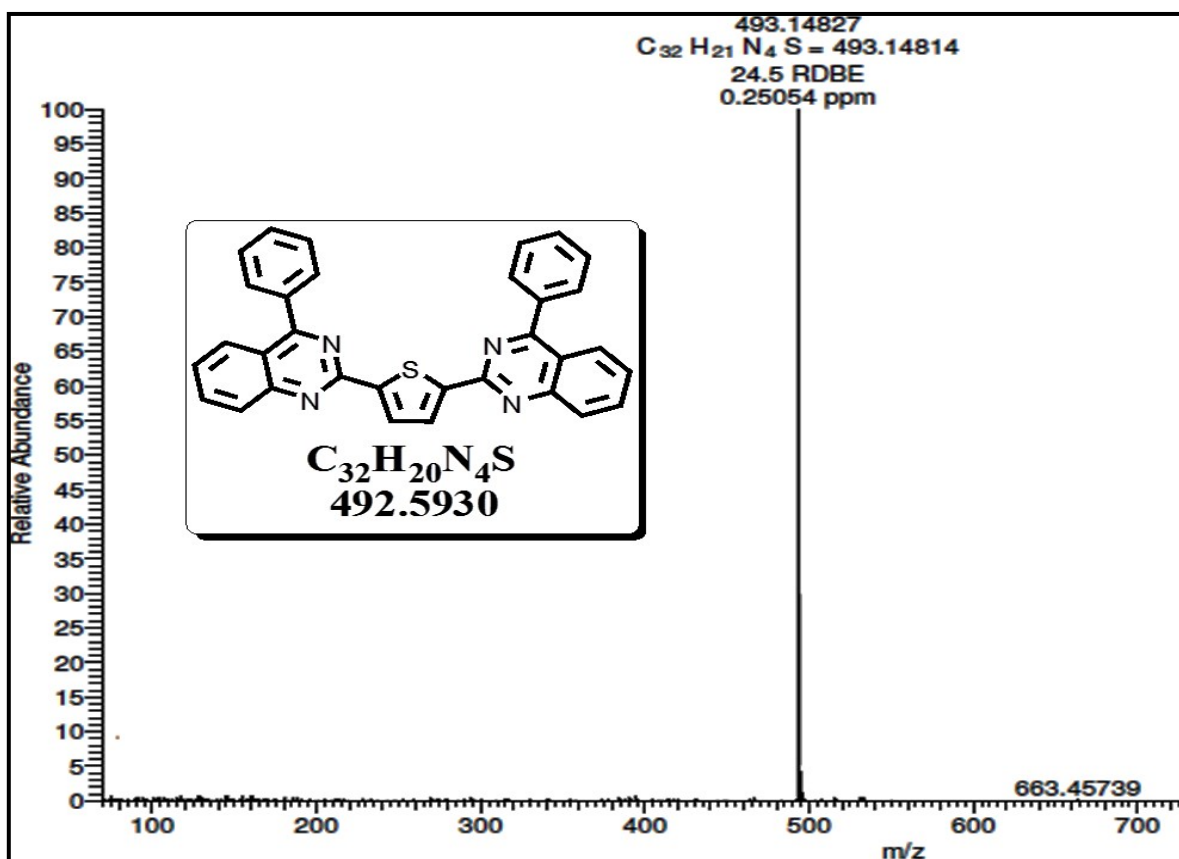

Fig. S4: ESI-HR Mass spectrum of BQT

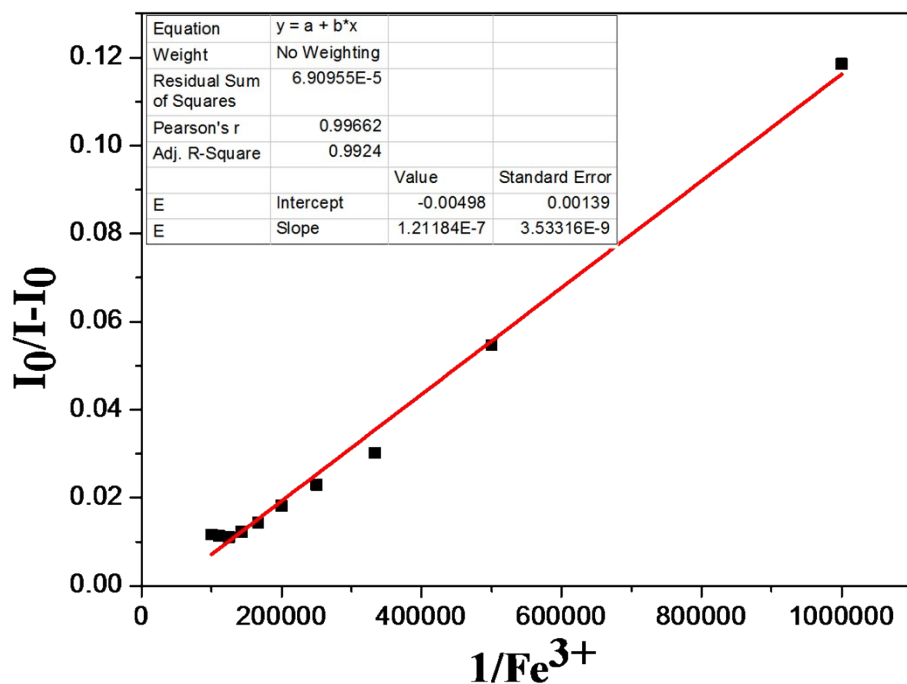

**Fig. S5:** Benesi–Hildebrand plots to determine binding constants for BQT-Fe<sup>3+</sup>  
 Binding constant was calculated using the following equation  
 Binding constant = Intercept/ Slope  
 The calculated binding constant for BQT-Fe<sup>3+</sup> is 4.1x 10<sup>-4</sup> M<sup>-1</sup>

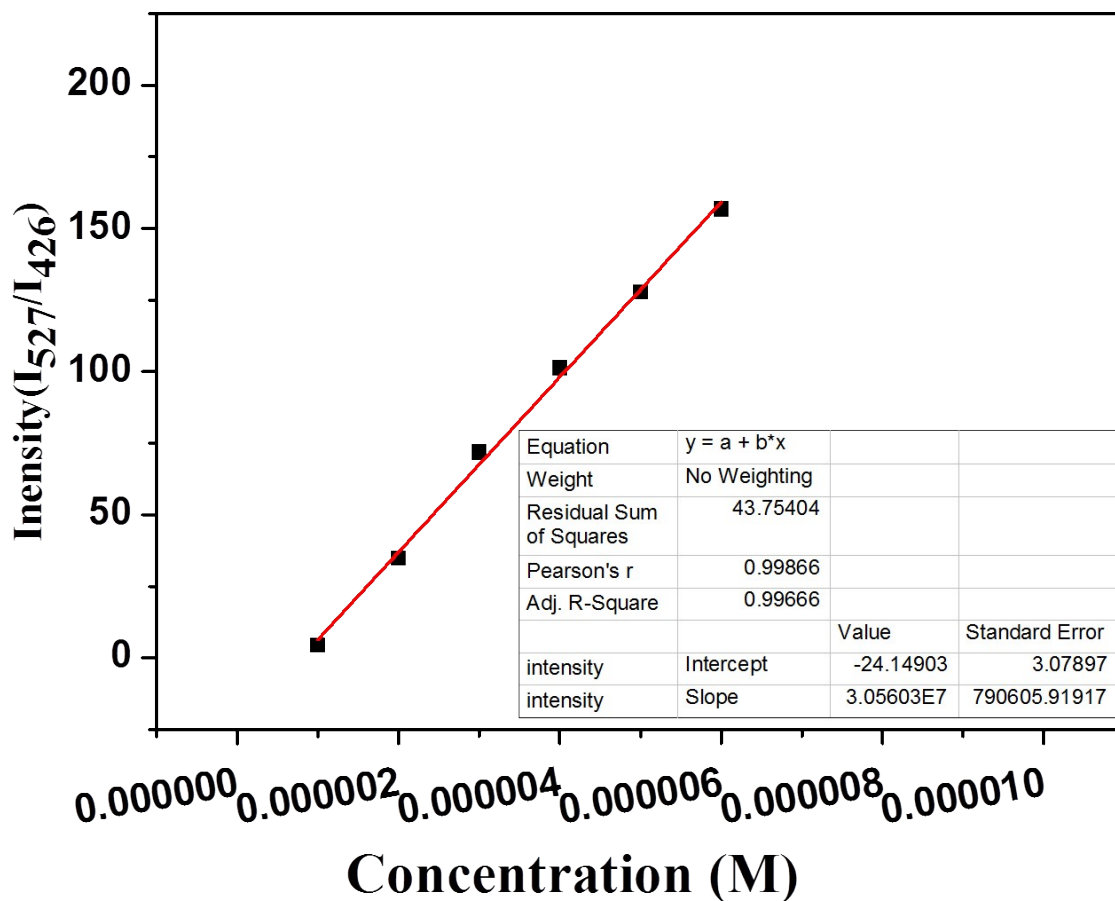

LOD =  $3\sigma/S$ , where  $\sigma$  is the standard deviation and S is the slope of the linearity curve.  $\sigma$  is 0.21 and  $S = 3.05603E7$ . LOD is  $2.0 \times 10^{-8}$  M. LOQ =  $3 \times \text{LOD} = 6.1 \times 10^{-8}$  M.

**Fig. S6:** Linearity curve from fluorescence titration for BQT-Fe<sup>3+</sup> complex

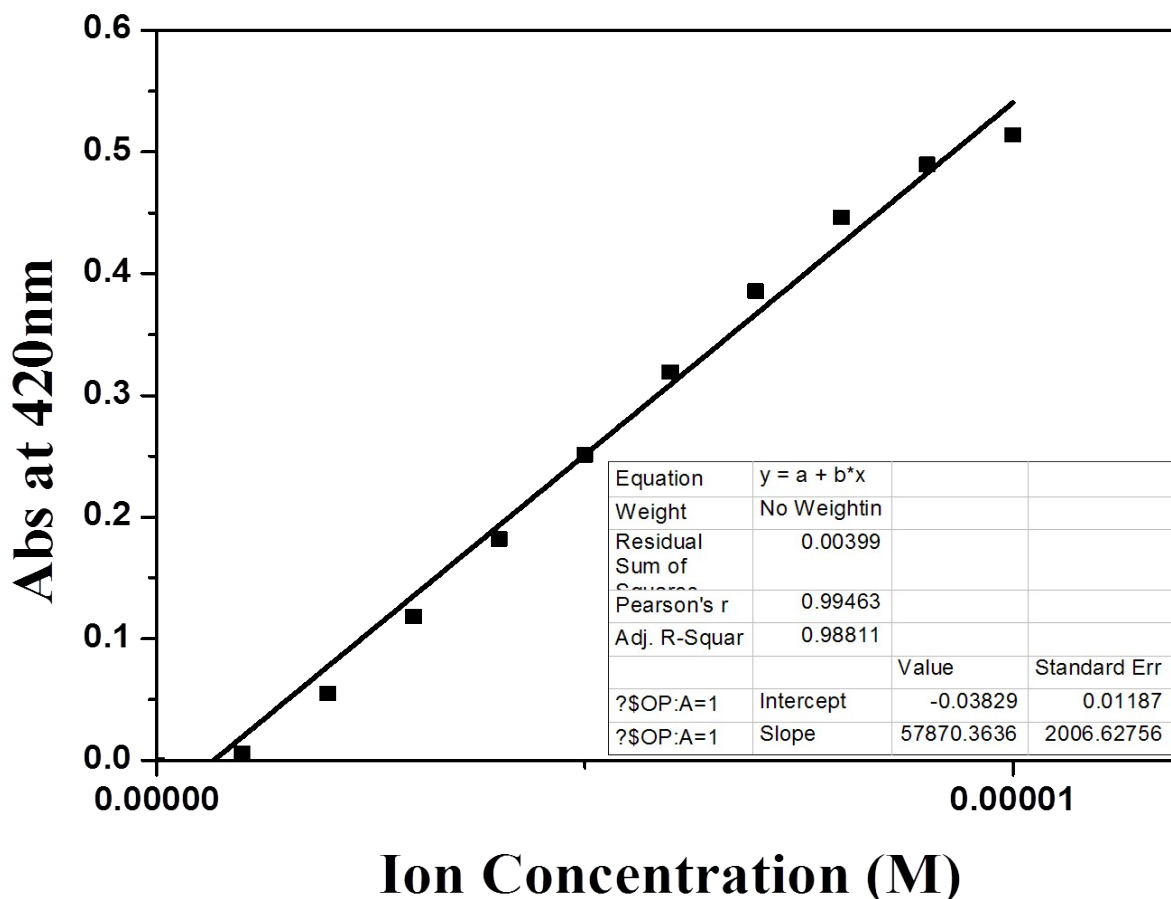

LOD =  $3\sigma/S$ , where  $\sigma$  = standard deviation and S = slope of the linearity curve. S = 57870.3636 and  $\sigma$  is 0.00092. LOD of BQT for Fe =  $1.6e-8$  M & LOQ of BQT for Fe =  $4.8e-8$  M

**Fig. S7:** Linearity curve from UV-Vis titration for BQT-Fe<sup>3+</sup> complex

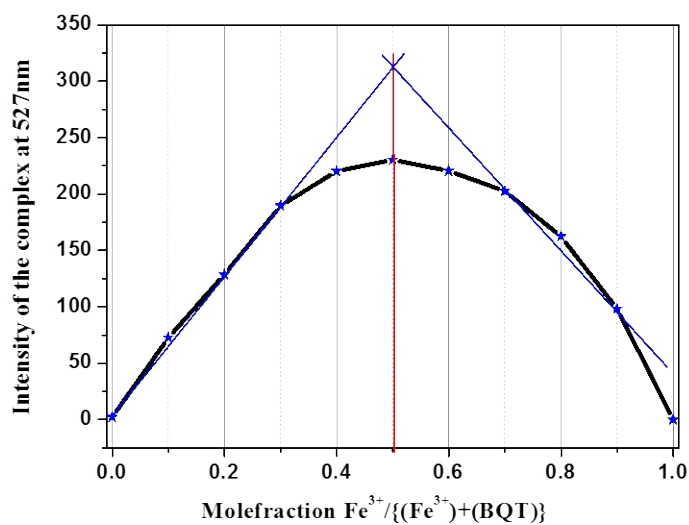

Fig. S8: Job's plot of BQT-Fe<sup>3+</sup> complex

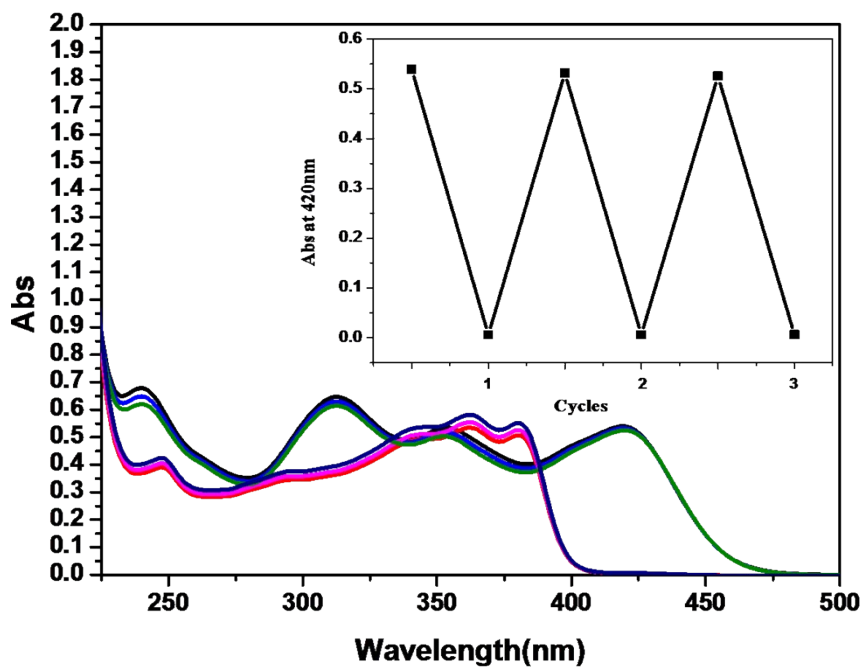

Fig. S9: Reversible cycles of absorption at 420 nm upon addition of Fe<sup>3+</sup> and EDTA alternatively in CH<sub>3</sub>CN solution of BQT.

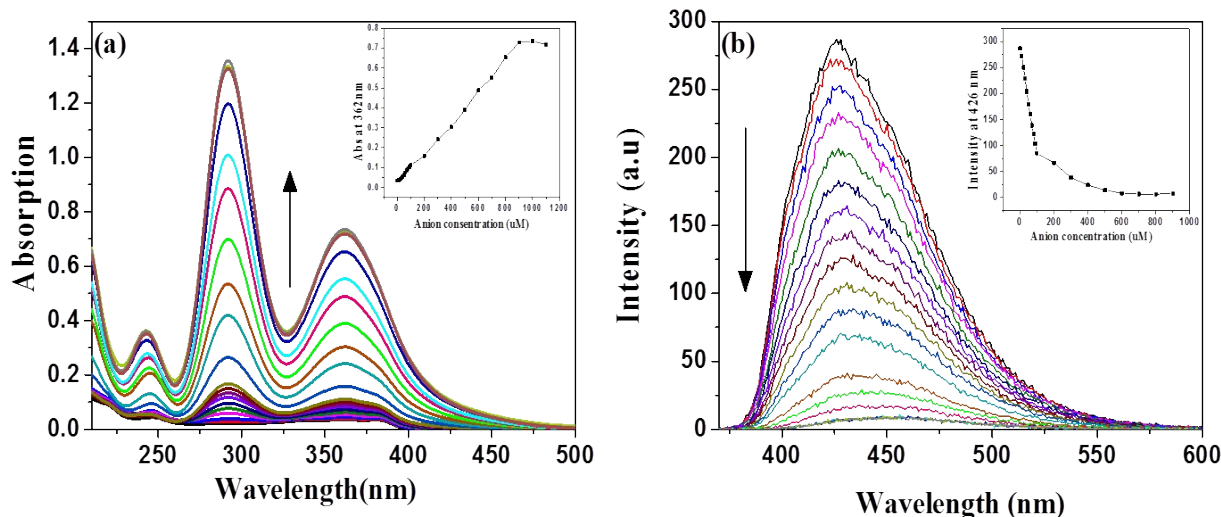

**Fig. S10:** The absorbance (a) spectra of I<sup>-</sup> titration (0-1100μM) Insets: absorbance at 362 nm Vs concentration of I<sup>-</sup> and fluorescence (b) spectra of I<sup>-</sup> titration (0-900μM) Insets: intensity at 426 nm Vs concentration of I<sup>-</sup> with the BQT (10 μM). Excitation wavelength is 362nm.

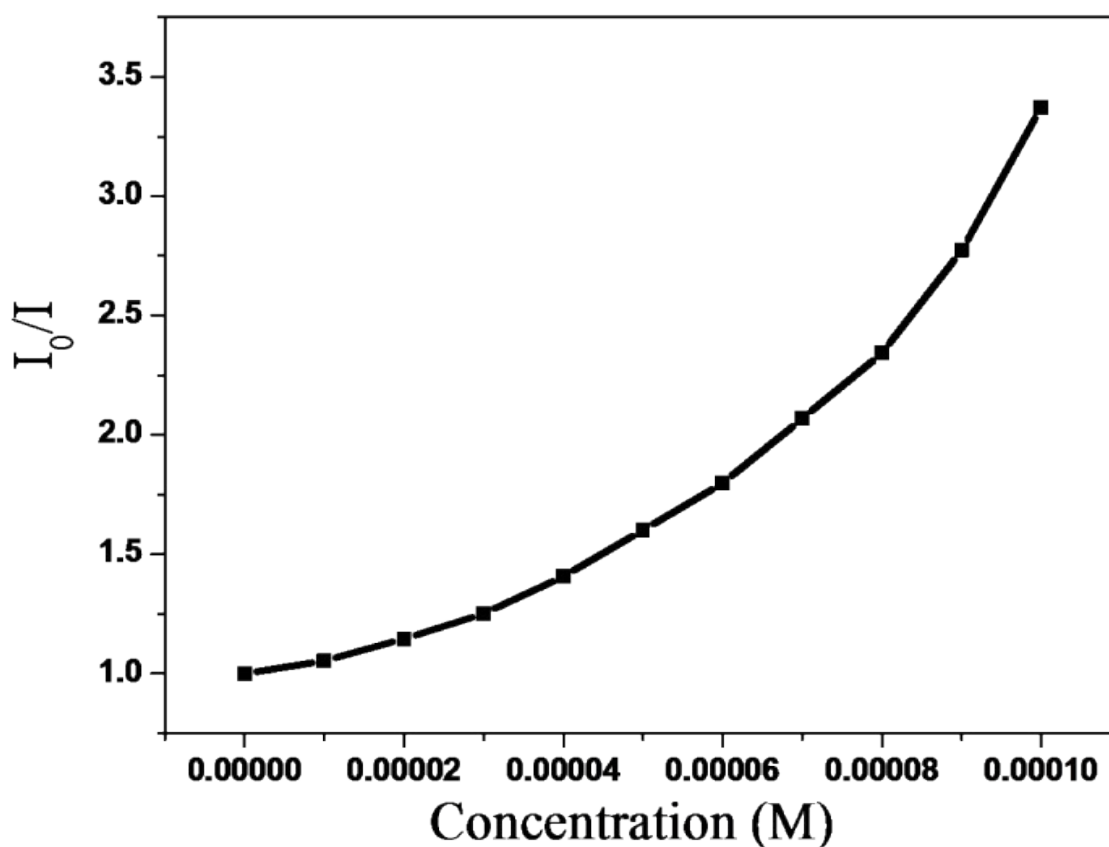

**Fig.S11:** Stern-Volmer plot for BQT quenching upon addition of iodide ion, here I<sub>0</sub> = BQT intensity without I<sup>-</sup> ion and I = intensity with I<sup>-</sup> ion.

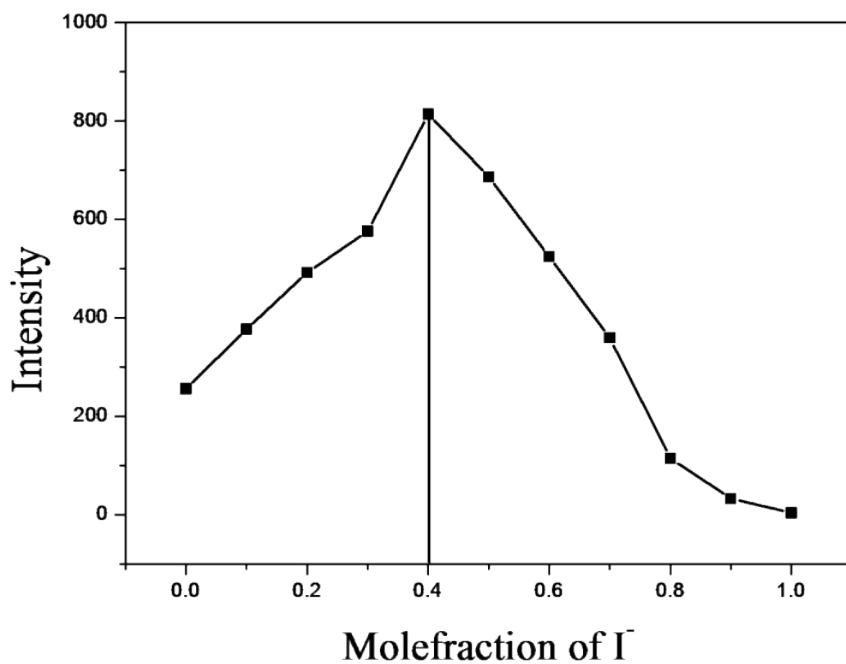

**Fig.S12:** Job's plot of BQT-I complex.

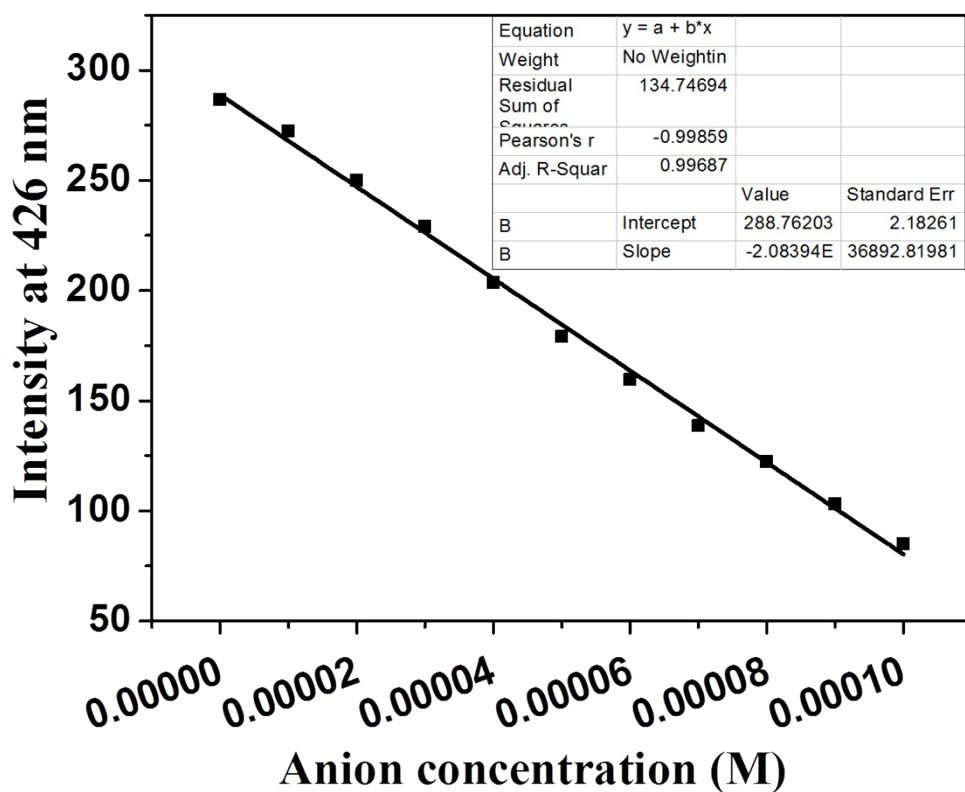

$LOD = 3\sigma/S$ , where  $\sigma$  = standard deviation and  $S$  = slope of the linearity curve.  $\sigma$  is 0.12 and  $S = 2083940$ .  $LOD$  of BQT for  $I^- = 1.7 \times 10^{-7}$  &  $LOQ$  of BQT for  $I^- = 5.2 \times 10^{-7}$

**Fig. S13:** Linearity curve from fluorescence titration for BQT- I complex
